# Supplementary material for: Pyridine-functionalised ambidextrous gelators: towards catalytic gels
Source: Royal Society of Chemistry journal article supplement (doi:10.1039/b510874h), 2005-01-01

## Supplementary Information

### Pyridine-functionalised Ambidextrous Gelators: Towards Catalytic Gels

Juan F. Miravet and Beatriu Escuder

Departament de Química Inorgànica i Orgànica, Universitat Jaume I, 12071 Castelló,  
Spain. E-mail: [escuder@qio.uji.es](mailto:escuder@qio.uji.es); Fax: +34-964-728214; Tel: +34-964-728235.

#### Compound 1a

$^1\text{H}$  NMR ( $\delta$ , ppm;  $\text{d}_6$ -DMSO, 300 MHz): 0.90 (m, 12H); 1.55 (m, 2 H); 2.10 (m, 2H); 3.08 (m, 4H); 4.23 (t, 7.5 Hz, 2 H); 7.46 (dd, 7.8 Hz, 4.8 Hz, 2 H); 8.035 (t, 5.4 Hz, 2H); (8.20, m, 2H); 8.50 (d, 8.7 Hz, 2H); 8.68 (d, 4.8 Hz, 2H); 9.00 (s, 2H);  $^{13}\text{C}$  NMR ( $\delta$ , ppm;  $\text{d}_6$ -DMSO, 75 MHz): 19.5, 20.0, 29.8, 30.7, 37.1, 59.9, 123.9, 130.5, 136.0, 149.4, 152.5, 165.8, 171.4; MS: 483.3 ( $\text{M}+\text{H}^+$ ). Melting point ( $^\circ\text{C}$ ): 250-253 (dec.)

#### Compound 1b

$^1\text{H}$  NMR ( $\delta$ , ppm;  $\text{d}_6$ -DMSO, 300 MHz): 0.90 (m, 12H); 1.55 (m, 2 H); 2.10 (m, 2H); 3.08 (m, 4H); 4.22 (t, 7.5 Hz, 2 H); 7.78 (d, 5.4 Hz, 4 H); 8.06 (t, 5.4 Hz, 2H); 8.58 (d, 8.4 Hz, 2H); 8.68 (d, 5.4 Hz, 4H);  $^{13}\text{C}$  NMR ( $\delta$ , ppm;  $\text{d}_6$ -DMSO, 75 MHz): 19.6, 20.0, 29.8, 30.6, 37.1, 60.0, 122.3, 141.9, 150.8, 165.7, 171.3; MS: 483.3 ( $\text{M}+\text{H}^+$ ). Melting point ( $^\circ\text{C}$ ): 249-257 (dec.).

#### Electron microscopy.

##### Preparation of samples for Transmission Electron Microscopy (TEM):

A copper grid coated with carbon (organogels) or formvar (hydrogels) was dipped into the gel sample. After drying in a dessicator, the samples were shadowed with Pt at  $45^\circ$ .

##### Preparation of samples for cryo-Scanning Electron Microscopy (cryo-SEM):

A drop of the gel was placed in a stub and was quickly cooled down at  $-220^\circ\text{C}$  with under-cooled nitrogen as slush. The sample was then introduced into the microscope cooling pre-chamber and it was allowed to warm up until  $-95^\circ\text{C}$ . At this temperature the upper part of the drop was fractured with a cool knife and etched for 2 min. Then, the pre-chamber was cooled down until  $-120^\circ\text{C}$  and the sample was sputtered in situ with 1.5 nm of Au/Pd. Finally, it was transferred into the microscope chamber where the temperature was kept below  $-130^\circ\text{C}$  to avoid the formation of ice crystals.

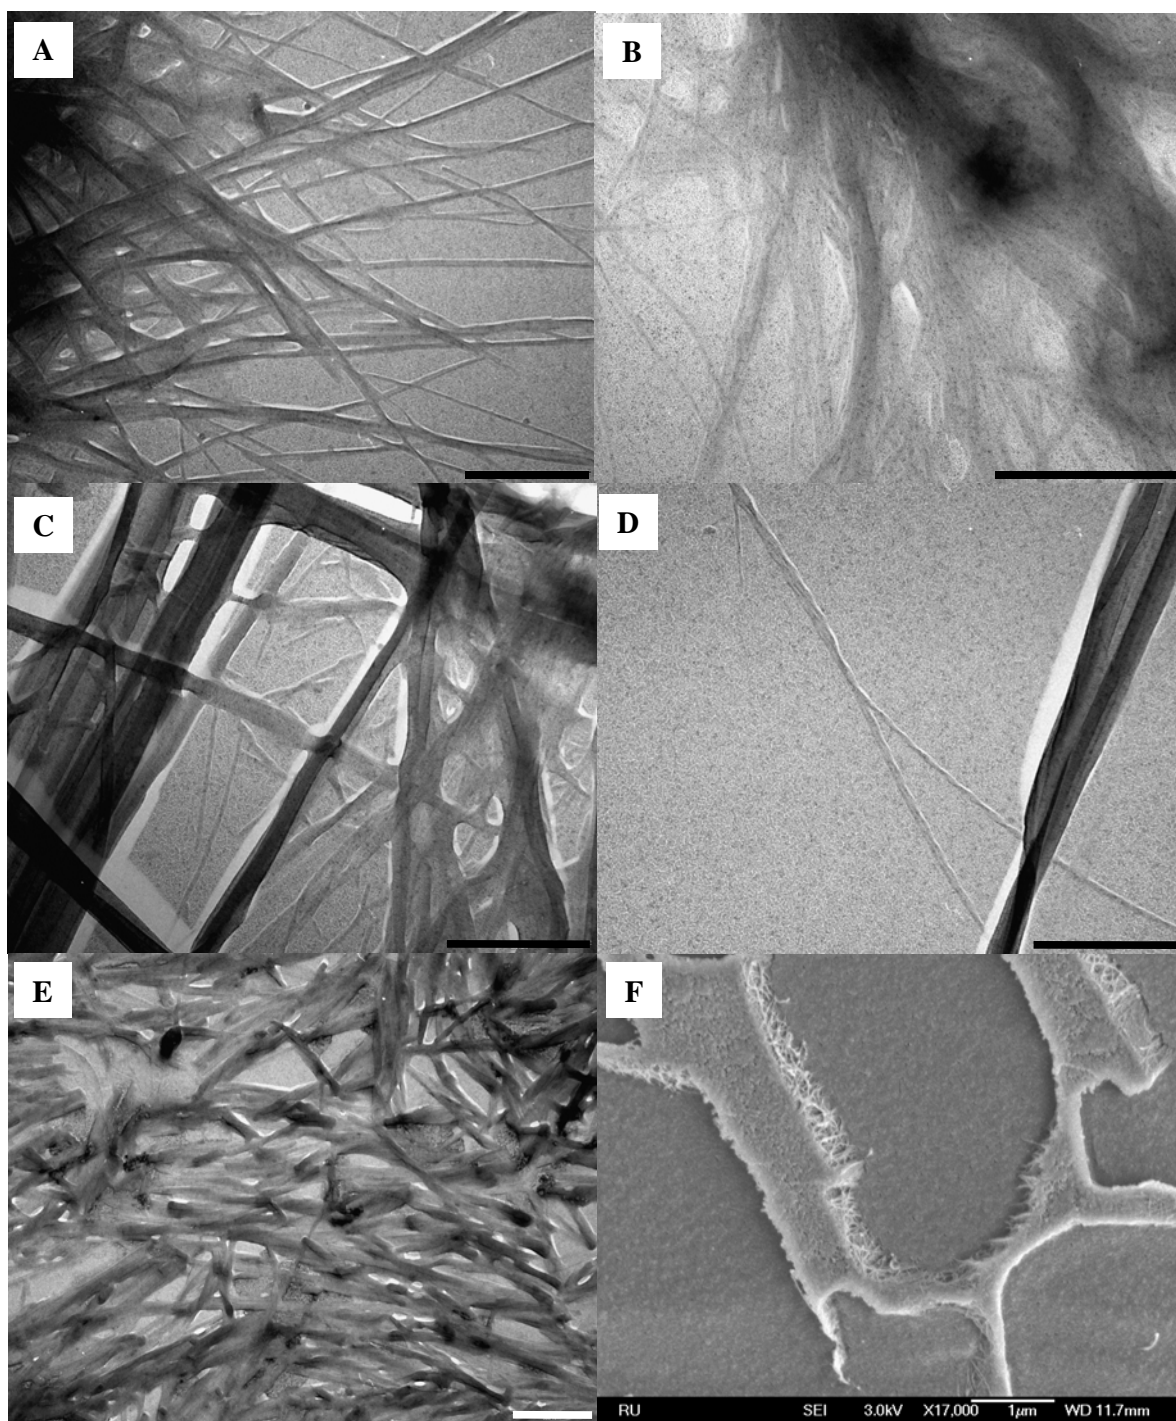

Figure S1. TEM images of xerogels of compound **1a** in acetone (A) and dioxane (B), compound **1b** in  $\text{CH}_2\text{Cl}_2$  (C, D) and dried hydrogel of compound **1b** (E). Bars represent 500 nm. (F) cryo-SEM image of hydrogel of compound **1a**.

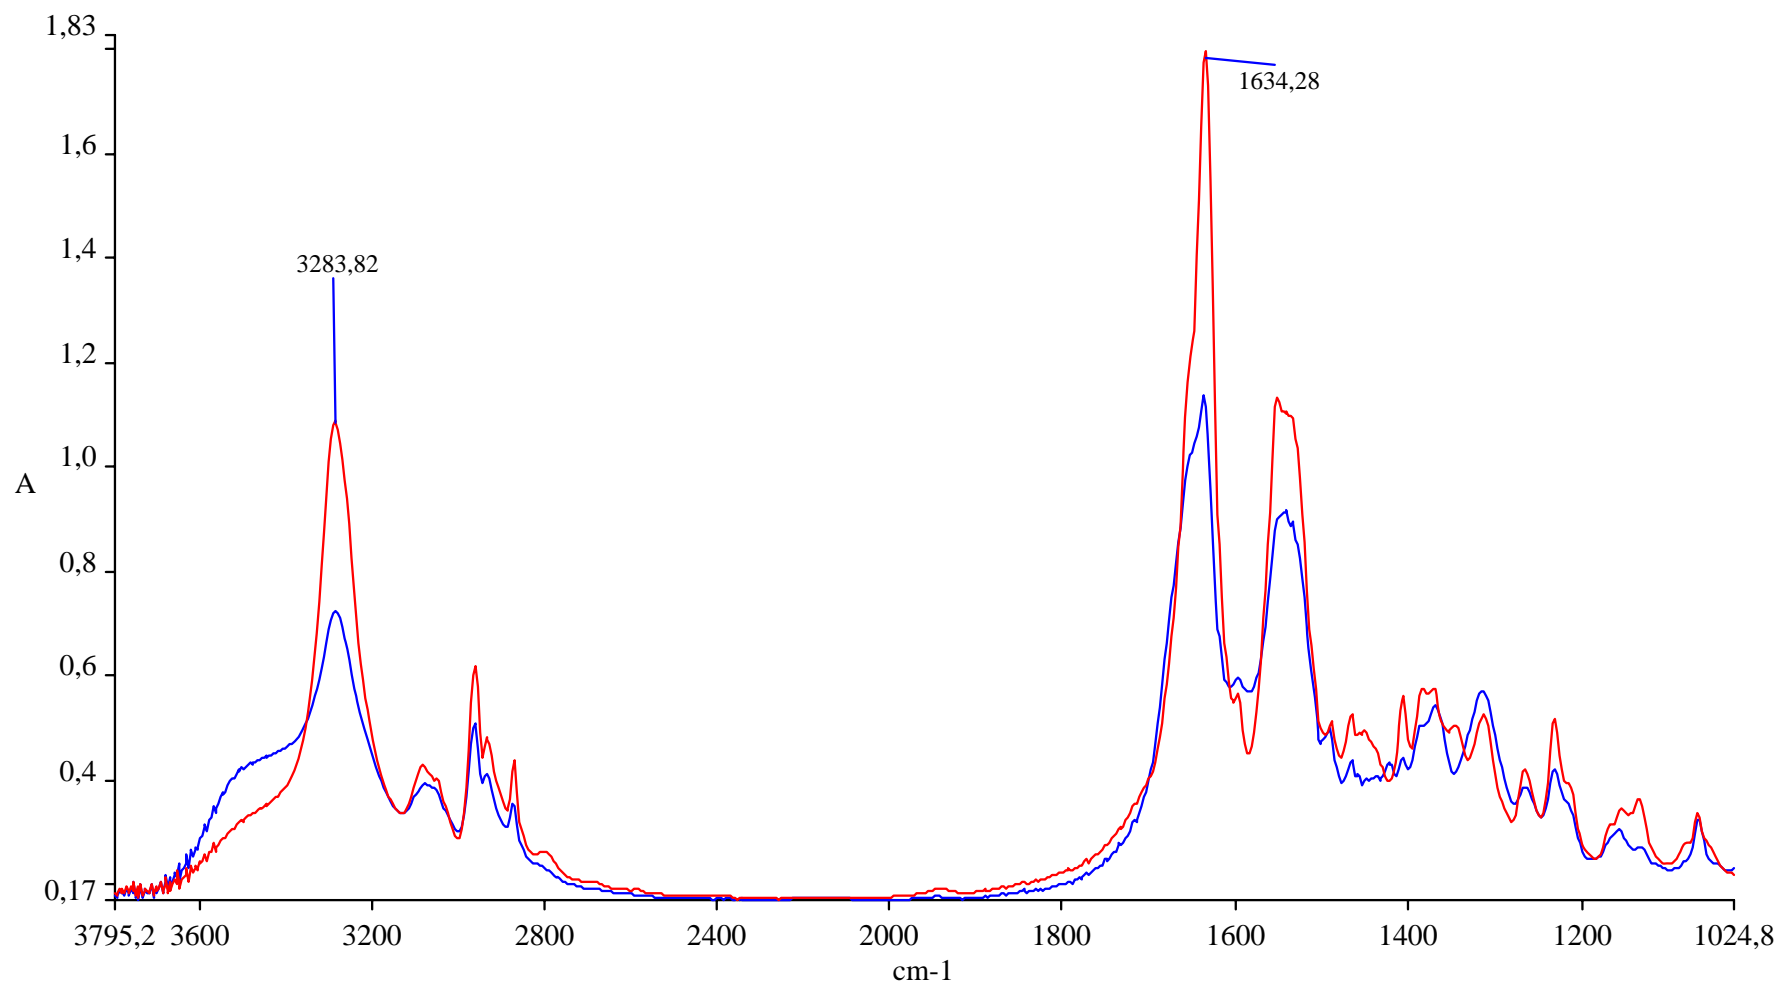

Figure S2. FT-IR spectra (KBr) of toluene xerogels of compound **1b** with (blue) and without (red) Pd(II).

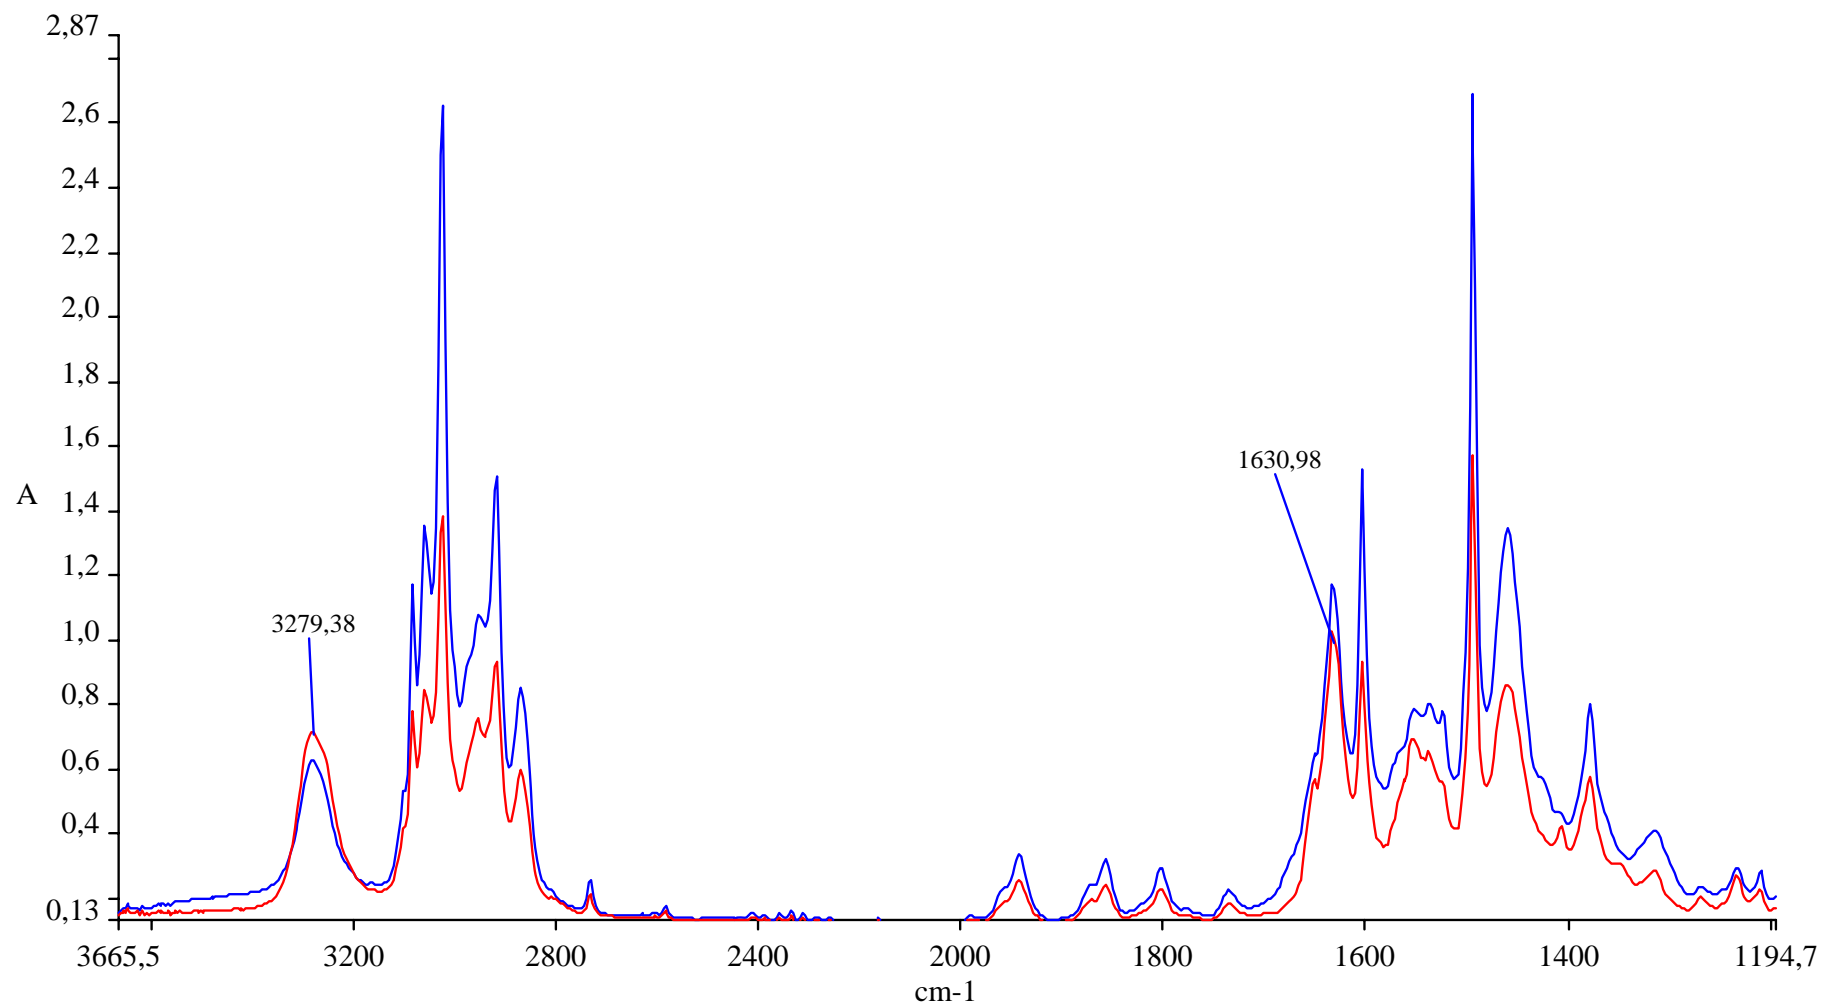

Figure S3. FT-IR spectra of toluene gels of compound **1b** before (red) and after (blue) addition of Pd(II).

# NMR spectroscopy

## Compound 1a

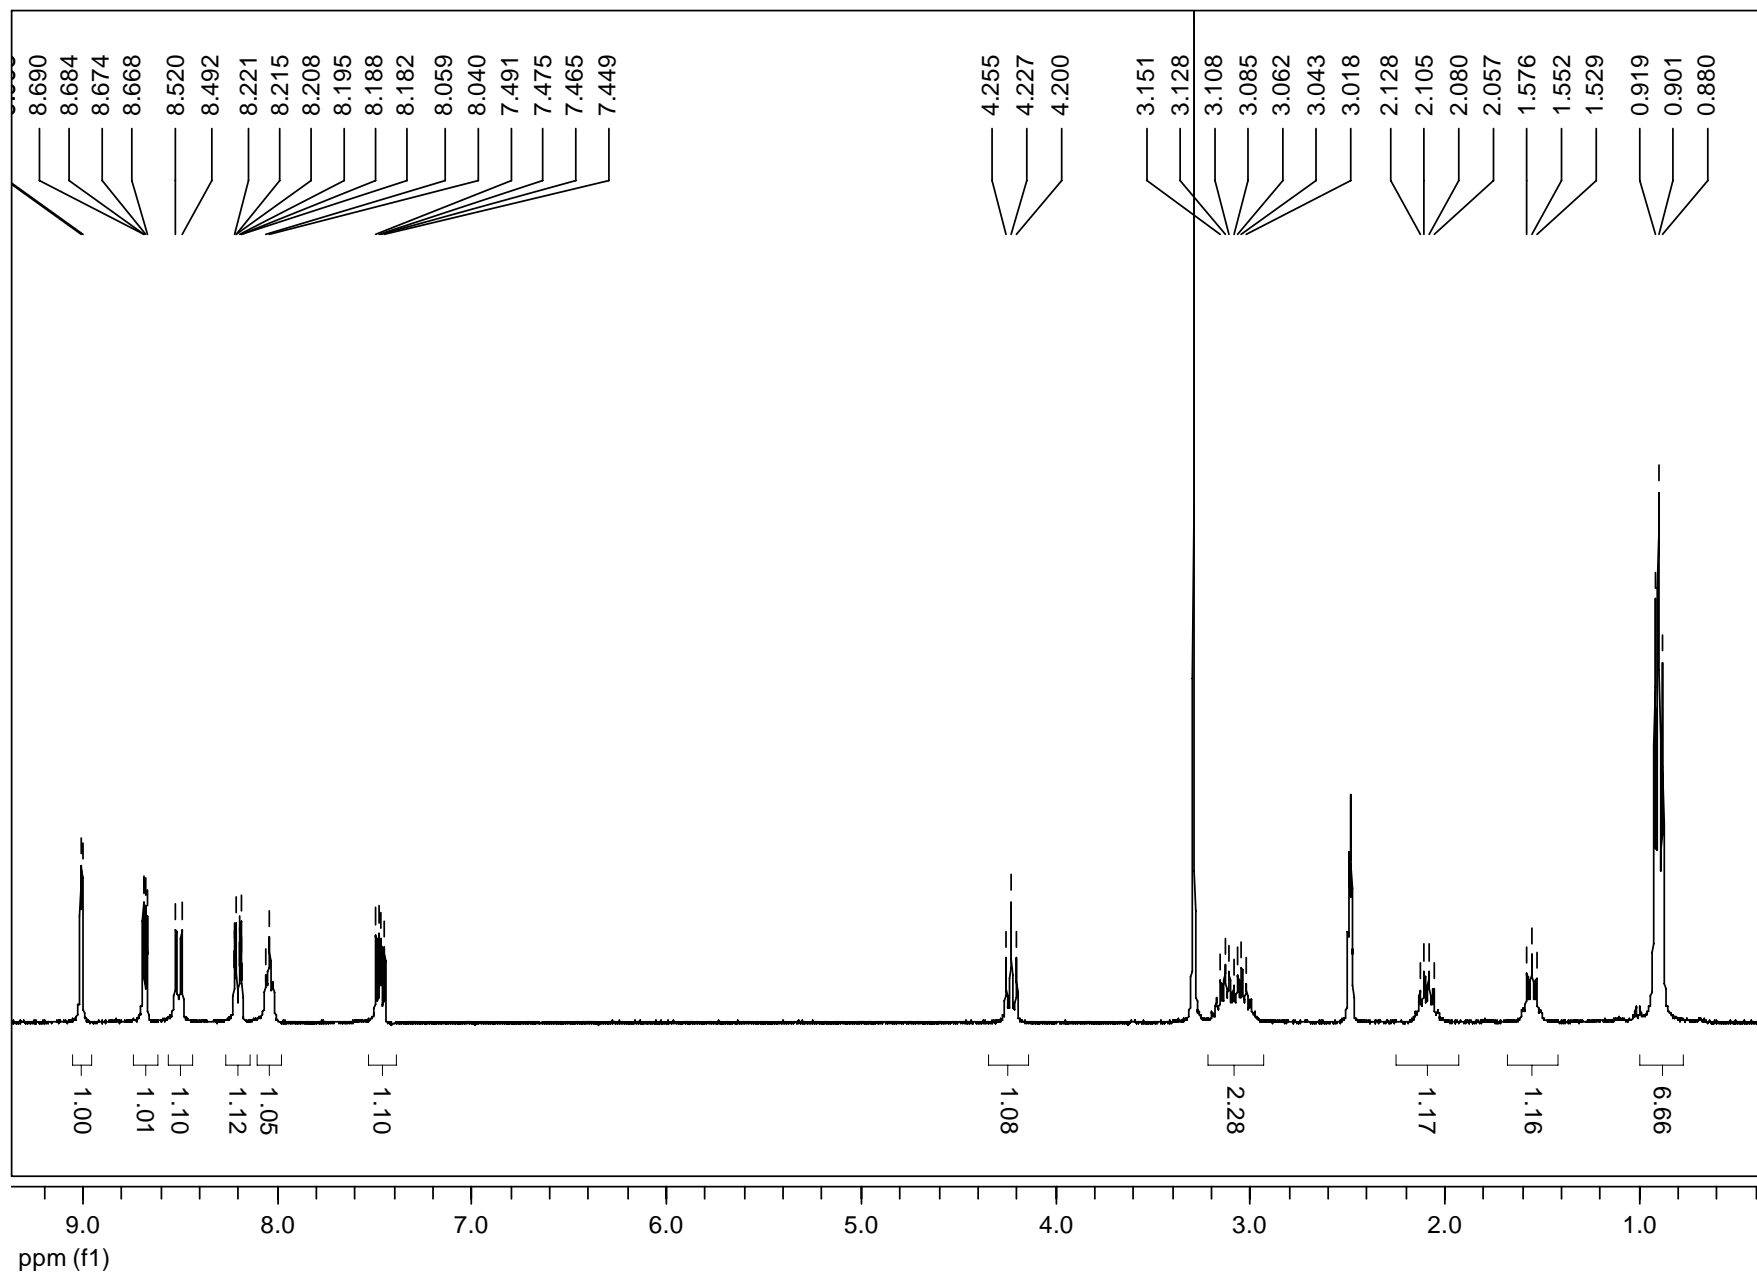

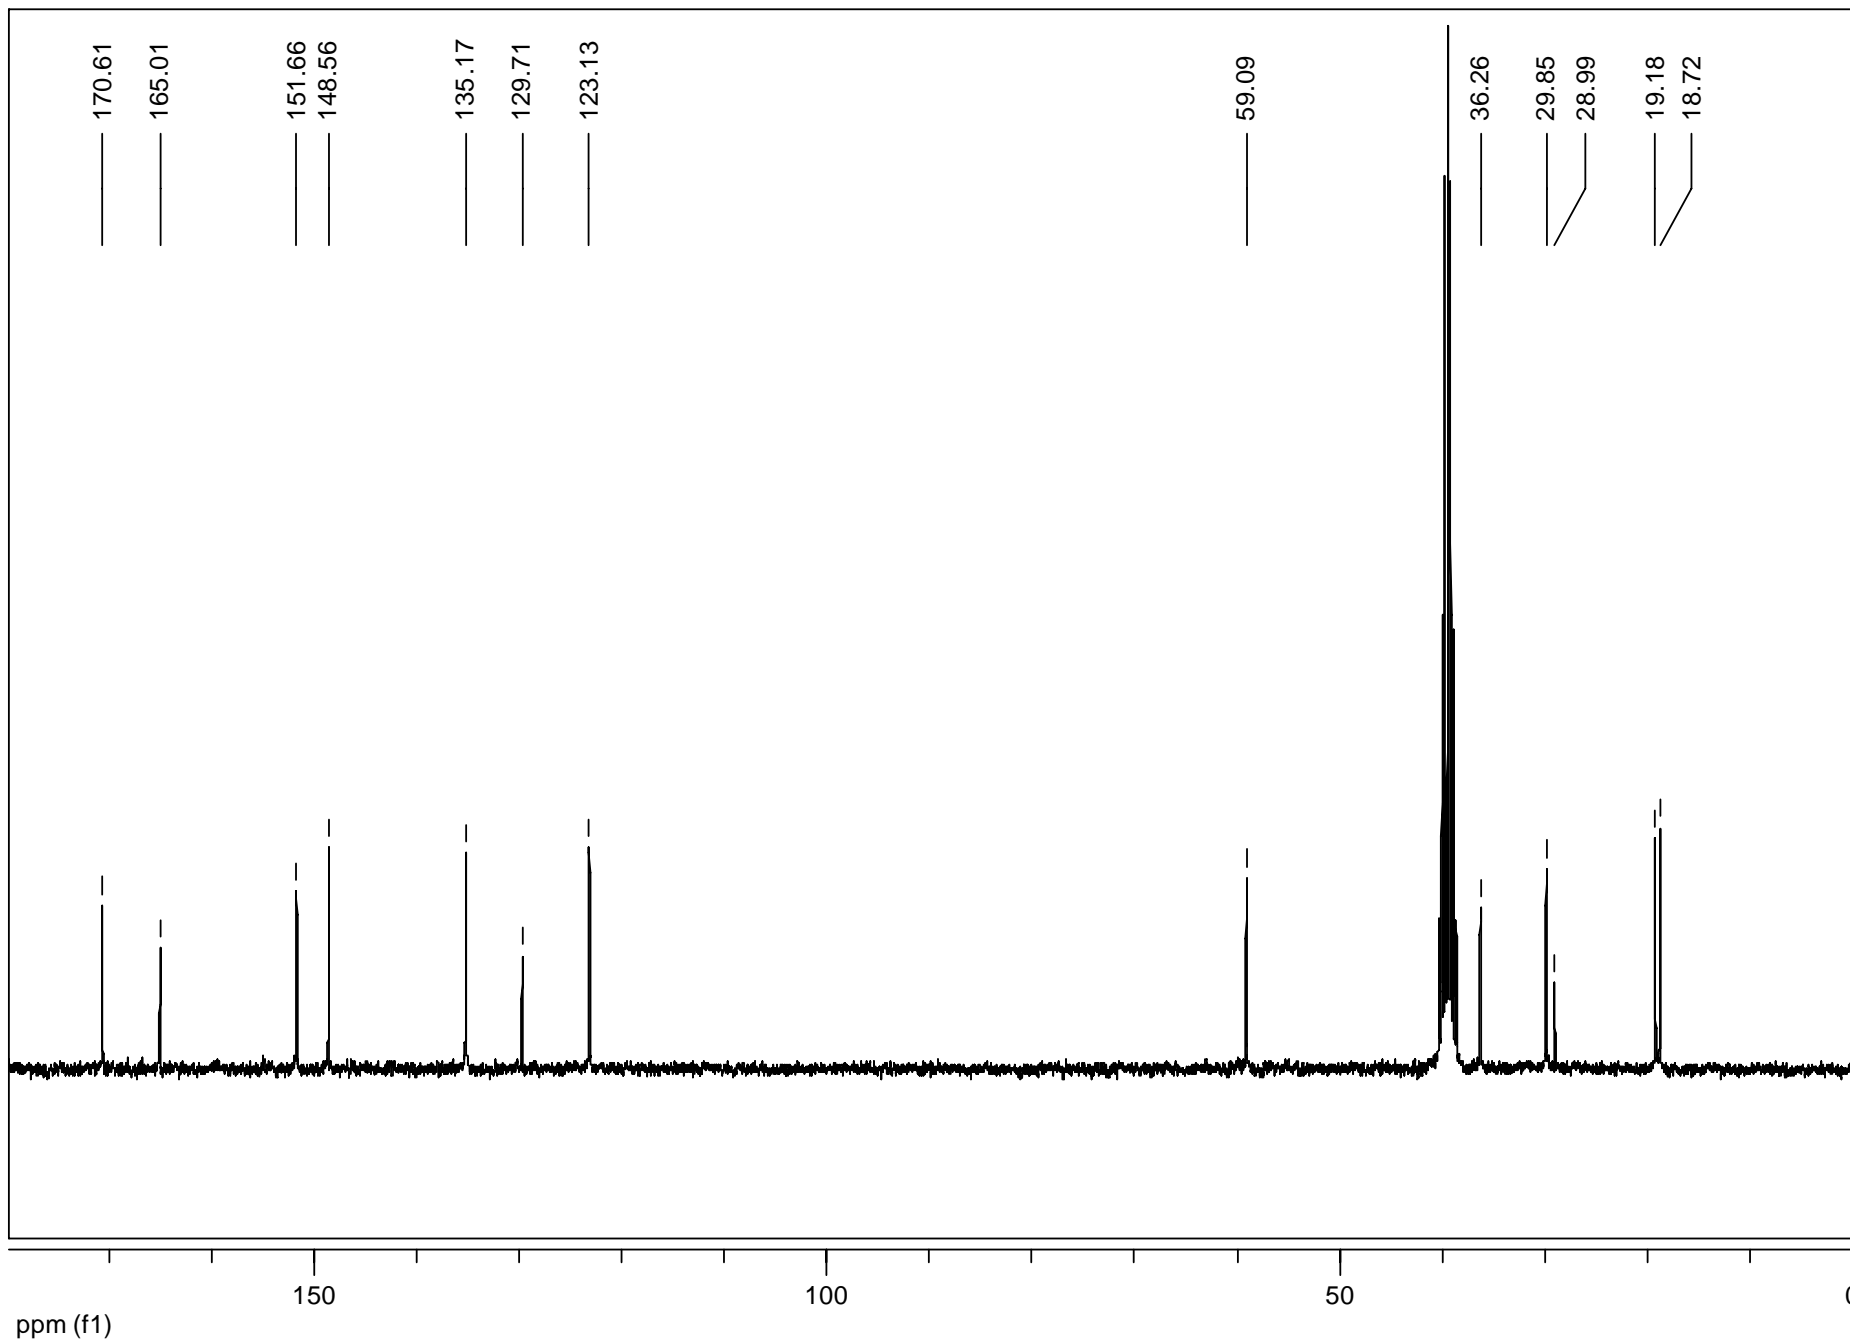

Compound 1b

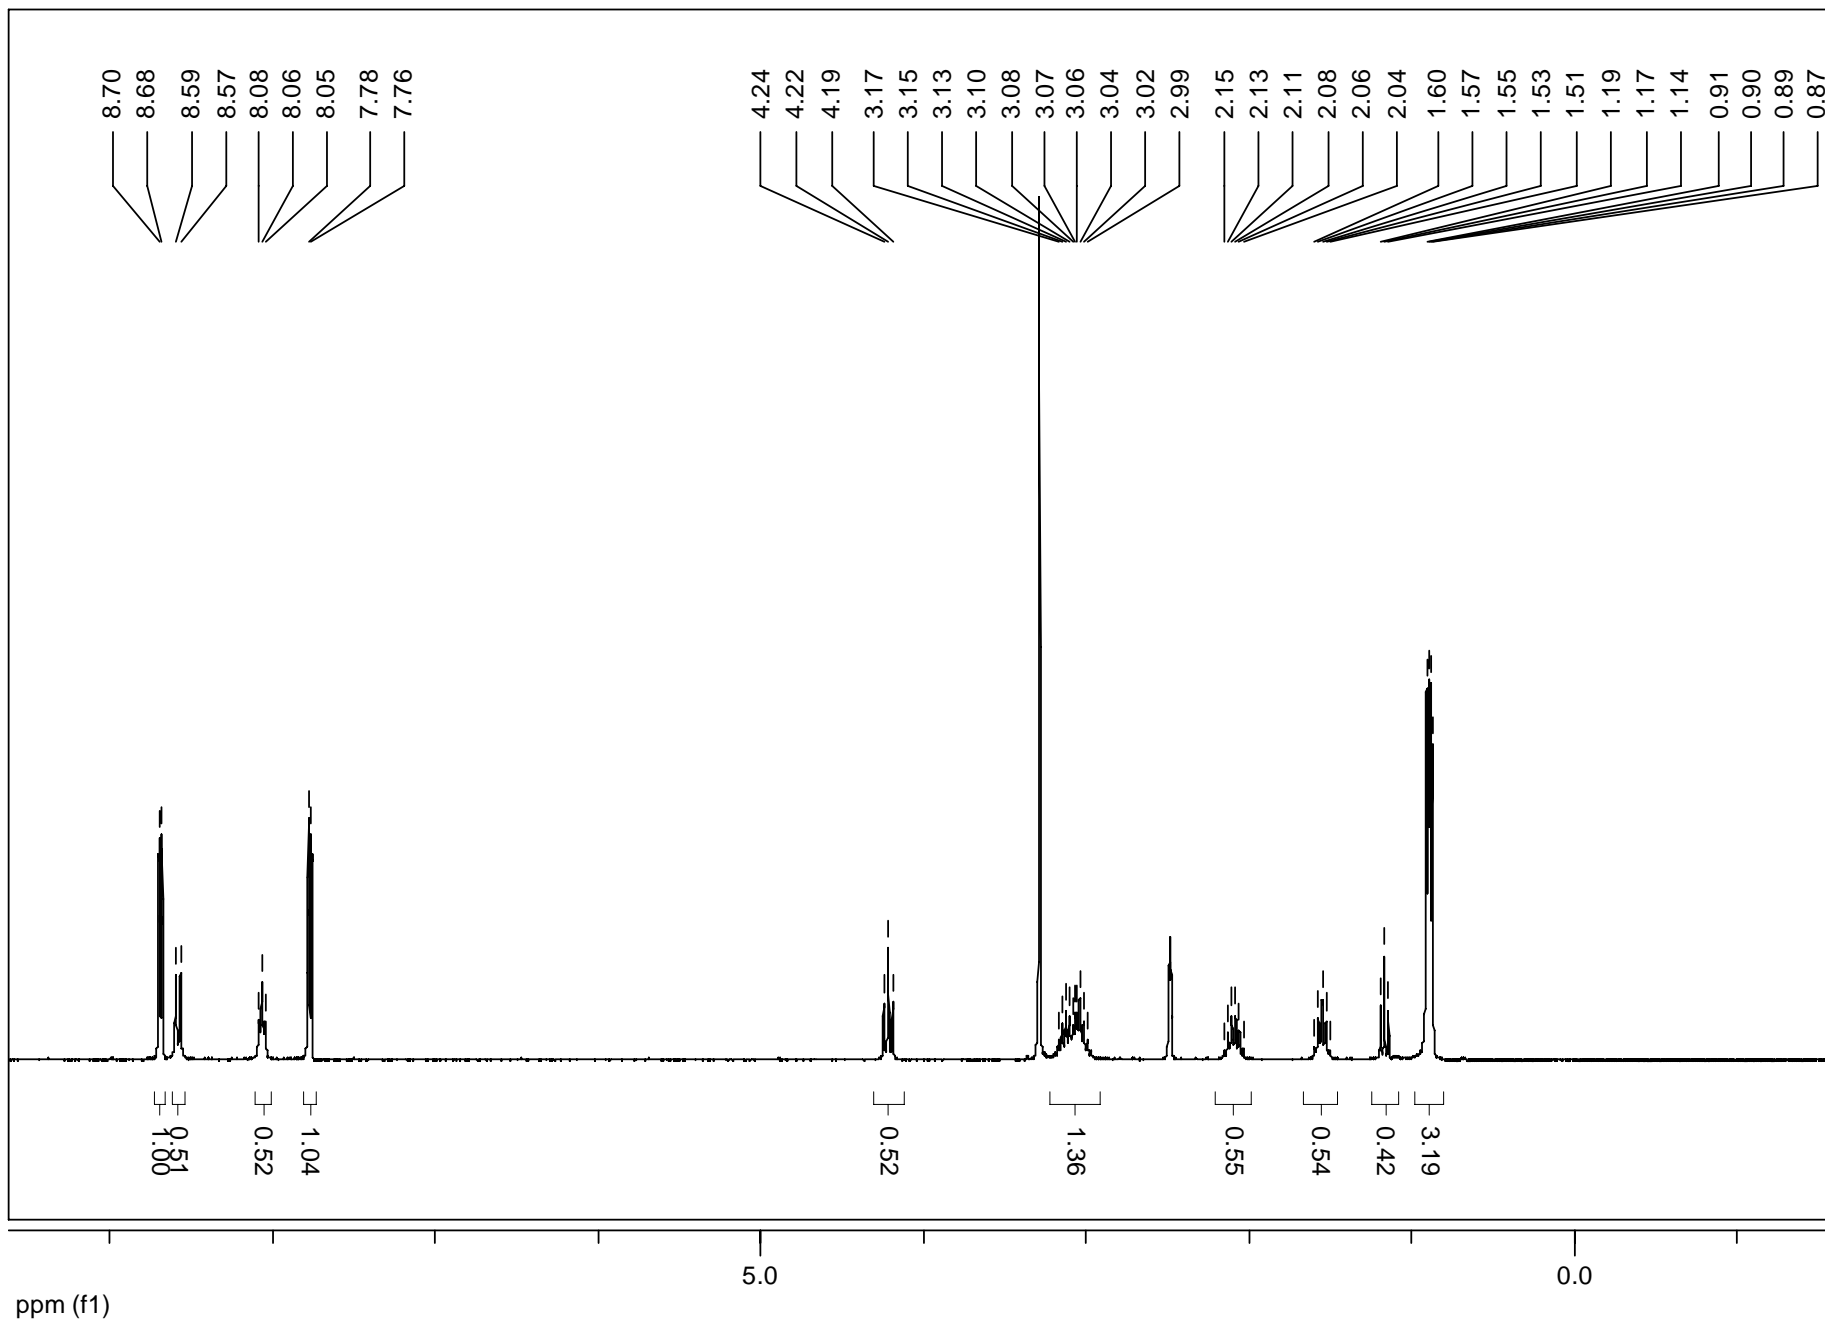

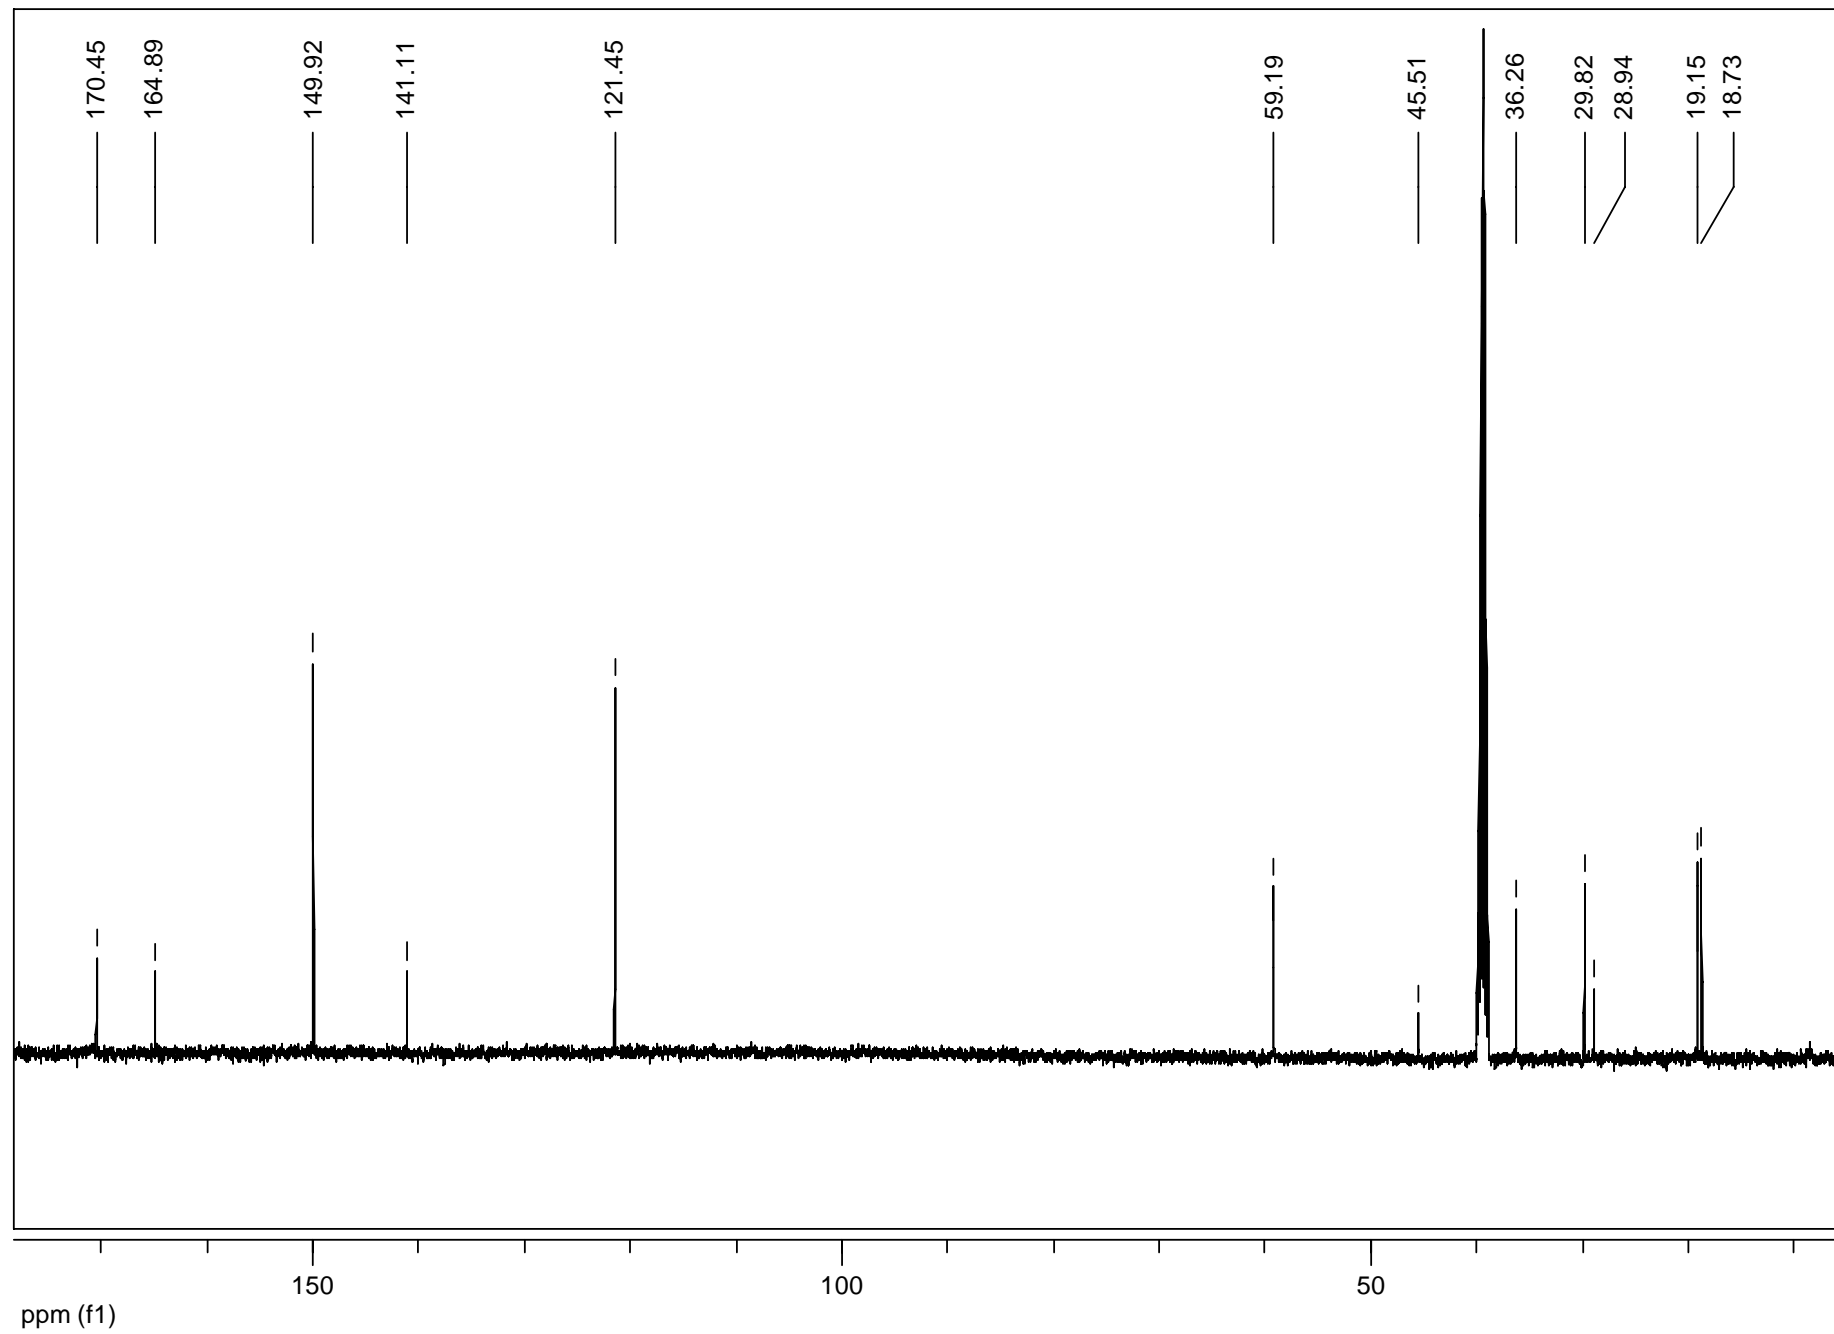

Supplement: b510874h.pdf [file b510874h.pdf]
